# Supplementary material for: FAM35A associates with REV7 and modulates DNA damage responses of normal and BRCA1‐defective cells
Source: PubMed Central journal article supplement (PMC6003645; doi:10.15252/embj.201899543), 2018-05-22
Supplement: EMBJ-37-e99543-s001.pdf [file EMBJ-37-e99543-s001.pdf]

## Expanded View Figures

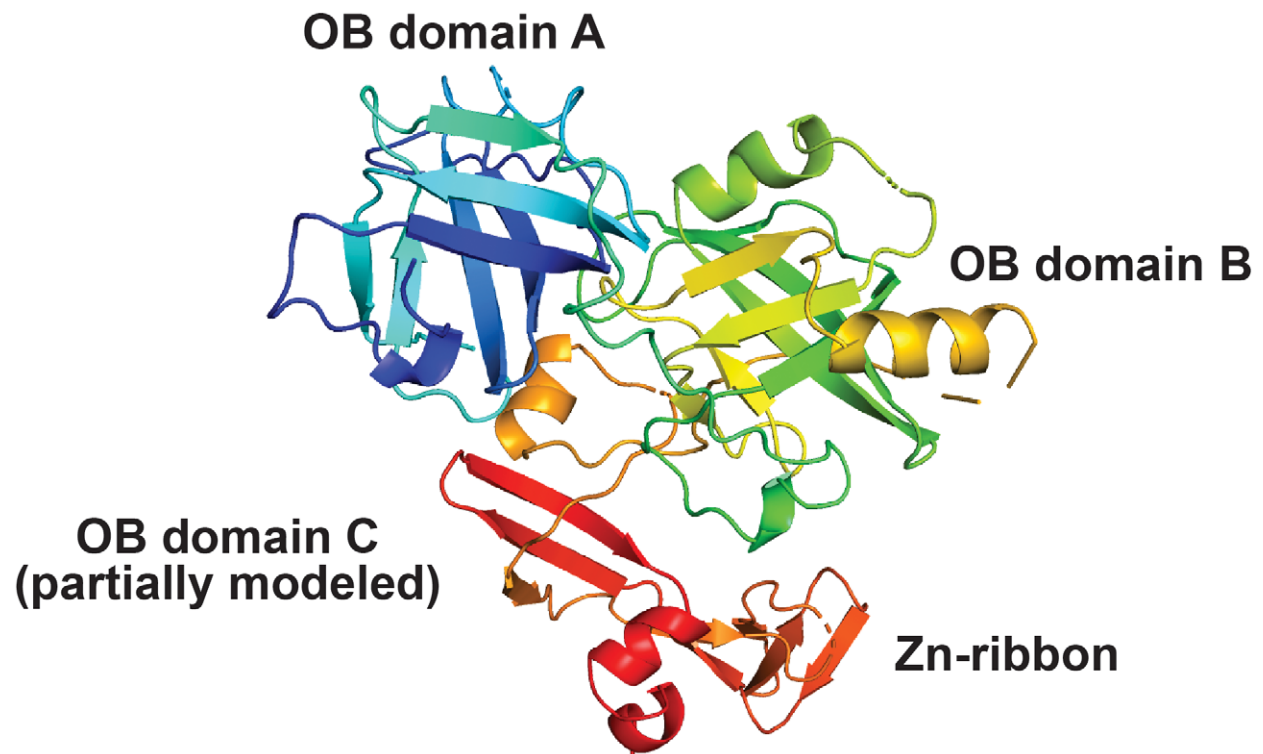

**Figure EV1. Partial model of the OB-fold domains of FAM35A.**

A view of a model generated by Phyre2 is shown for FAM35A isoform 1 residues 402–904, using template 4GOP (chain C, the RPA 70 kDa subunit from *Ustilago maydis*). The model includes OB folds with five-stranded beta barrels for OB domain A and OB domain B. The first three beta strands of OB domain C are modeled, with the Zn-ribbon that occurs in a loop between OB fold C beta strands 1 and 2 (Fig. EV2). The Phyre2 coordinates were rendered in PyMOL using spectrum coloring.

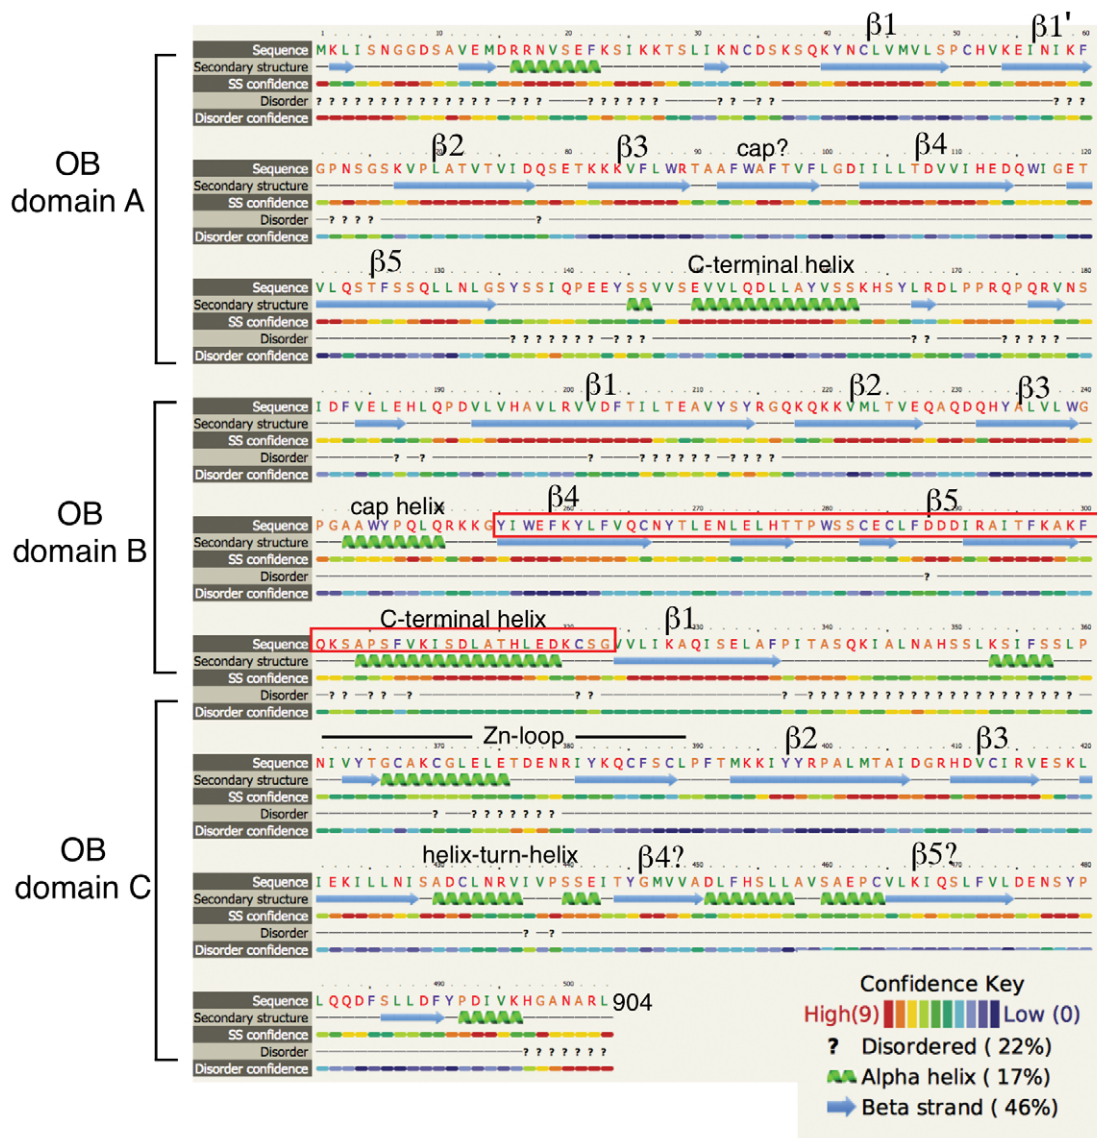

**Figure EV2. Secondary structure element assignment for the ordered region of human FAM35A.**

The secondary structure assignment is derived from the Phyre2 model of human FAM35A isoform 1 (Fig EV1) and largely coincides with features in the three functional DNA-binding domains (dbdA, B, and C) of RPA1 (PDB: 4GQP, 1FGU), with a few differences. In FAM35A, a C-terminal helix is predicted to be present at the end of both OB folds A and B, unlike in RPA1 where this helix only follows OB domain B. Beta strands 4 and 5 of OB domain C were not modeled by Phyre2 but candidate beta strands are present in appropriate positions, as noted. The exon that is absent in FAM35A isoform 2 results in 69 fewer residues (red box), deleting structural elements of OB domain B.

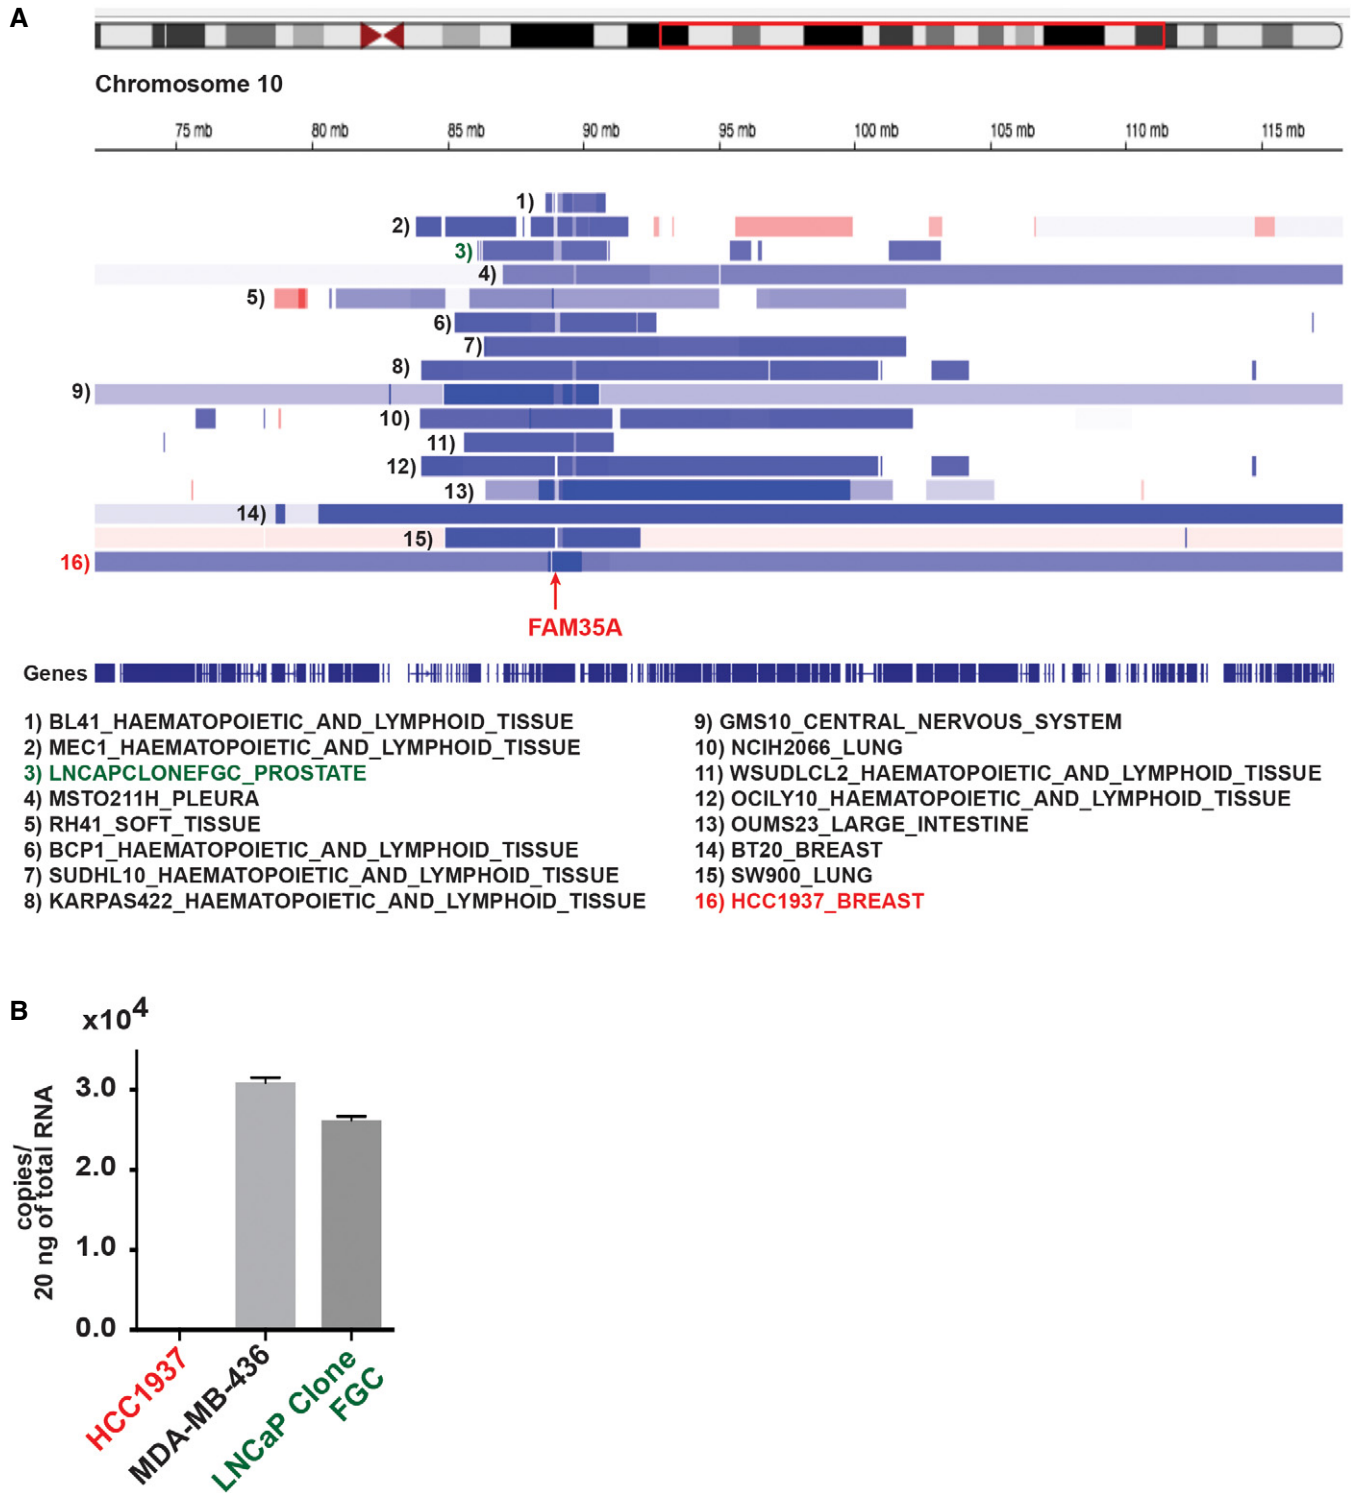

**Figure EV3. Potential FAM35A alterations in human cancer cell lines.**

A Cell lines annotated in the Cancer Cell Line Encyclopedia with deep deletion of FAM35A. Data accessed from cBioPortal, February 2018. A region of chromosome 10q (red box) is expanded below to show calls for deep deletion (dark blue), shallow deletion (light blue), or amplification (red).

B Quantification of endogenous FAM35A mRNA expression. Endogenous FAM35A mRNA from HCC1937 (*BRCA1* mutant), MDA-MB-436 (*BRCA1* mutant), and LNCaP clone FGC cell lines was quantified using qPCR. Data represent mean  $\pm$  SEM.  $n = 3$ .
